# Supplementary material for: The impact of the Red Blood Cell Distribution Width/Albumin Ratio on All-Cause and Cardiovascular Mortality in Patients with Cardiovascular-Kidney-Metabolic Syndrome: Evidence from NHANES 2009– 2018
Source: Research Square preprint supplement (doi:10.21203/rs.3.rs-6321371/v1), 2025-04-04
Supplement: Supplementary file 1 [file 713843a18505092fbbb43015.docx]

**Supplementary -table 1. Distribution of variables with missing data**

| variables | Number of Missing | Missing proportion |
| --- | --- | --- |
| Educational level | 10 | 0.10% |
| BMI | 110 | 1.07% |
| Waist circumference | 390 | 3.81% |
| TG | 8 | 0.08% |
| TC | 2 | 0.02% |
| HBA1C | 13 | 0.13% |
| BUN | 2 | 0.02% |
| UA | 5 | 0.05% |
| Poverty | 959 | 9.37% |
| Smoke | 6 | 0.06% |
| Hypertension | 14 | 0.14% |
| DM | 164 | 1.60% |
| Depression | 878 | 8.58% |
| Sleep problems | 842 | 8.23% |
| Stroke | 10 | 0.10% |
| ACR | 109 | 1.07% |
| eGFR | 1 | 0.01% |
| CKD | 64 | 0.63% |

**Supplementary -table 2. Definitions/criteria of some diagnoses**

| Variables | Definitions/criteria |
| --- | --- |
| Smoker[1] | (1)Never smokers: Participants who claimed to have smoked fewer than 100 cigarettes over their lifetime;(2)Former smoker: A person who has smoked more than 100 cigarettes in the past but has now quit smoking;(3)Current smokers: individuals who are still smoking at present. |
| Hypertension | A medical history of hypertension, systolic blood pressure (SBP) > 140 mmHg, or diastolic blood pressure(DBP) > 90 mmHg, meeting any one of these criteria results in a diagnosis of hypertension. |
| Diabetes mellitus | A diagnosis of diabetes can be made if any one of the following criteria is met: a history of diabetes, insulin therapy, the use of antidiabetic drugs to lower blood glucose levels, hemoglobin A1c level ≥ 6.5%, fasting blood glucose level ≥ 126 mg/dL, or a postprandial blood glucose level ≥ 200 mg/dL. |
| Depression[2] | Clinically significant depressive symptoms are defined as having a PHQ-9 score of ≥10. |
| Sleep problems[3] | Based on the participant's self-report on the following question: "In the past two weeks, how often have you been bothered by the following issues: difficulty falling asleep, difficulty staying asleep, or sleeping too much?" If the participant responds "more than half the days" or "nearly every day," they are considered to have a sleep disorder. If the participant responds "several days" or "not at all," they are considered to have no sleep problems. |
| Hyperlipidemia[4] | Participants are considered to have hyperlipidemia if they meet any of the following criteria: (1). Total cholesterol (TC) ≥ 200 mg/dL; (2). Triglycerides (TG) ≥ 150 mg/dL; (3). Low-density lipoprotein cholesterol (LDL-C) ≥ 130 mg/dL; (4). High-density lipoprotein cholesterol (HDL-C) ≤ 40 mg/dL for males or ≤ 50 mg/dL for females. Additionally, participants who are on lipid-lowering medication are also considered to have hyperlipidemia. |
| Stroke[5] | When subjects respond "yes" to the question "Has a doctor or other health professional ever told you that you had a stroke?", they are considered to have a stroke. |
| Chronic kidney disease | estimated glomerular filtration rate (eGFR) less than 60 mL/min/1.73 m² or urine albumin-to-creatinine ratio (ACR) greater than 30 mg/g |

**Supplementary -table 3. Baseline characteristics after excluding individuals with any missing values.**

| Variables | Total  (n =8082 ) | Q1  (< 2.96)  N=1750 | Q2  (2.96-3.21) N=1897 | Q3  (3.21-3.54) N=2076 | Q4  ( >3.54)  N=2359 | P value |
| --- | --- | --- | --- | --- | --- | --- |
| Age (years) | 49.30 (0.32) | 43.48 (0.65) | 49.07 (0.47) | 52.29 (0.49) | 52.27 (0.56) | <0.001 |
| Sex (%) |  |  |  |  |  | <0.001 |
| Male | 4163 (51.45) | 1195 (66.34) | 1087 (56.83) | 1021 (49.69) | 860 (33.18) |  |
| Female | 3919 (48.55) | 555 (33.66) | 810 (43.17) | 1055 (50.31) | 1499 (66.82) |  |
| Race (%) |  |  |  |  |  | <0.001 |
| Mexican American | 1241 (8.77) | 310 (8.99) | 287 (8.46) | 332 (8.96) | 312 (8.68) |  |
| Non-Hispanic White | 853 (5.73) | 155 (4.73) | 212 (5.88) | 239 (5.84) | 247 (6.46) |  |
| Non-Hispanic Black | 3455 (68.15) | 846 (73.11) | 892 (71.97) | 875 (68.23) | 842 (59.36) |  |
| Other Hispanic | 1493 (9.71) | 146 (4.35) | 232 (6.16) | 395 (10.11) | 720 (18.15) |  |
| Other Race - Including Multi-Racial | 1040 (7.64) | 293 (8.83) | 274 (7.53) | 235 (6.86) | 238 (7.35) |  |
| BMI (%) |  |  |  |  |  | <0.001 |
| Underweight (< 18.5) kg/m² | 74 (1.01) | 19 (1.07) | 19 (0.84) | 24 (1.63) | 12 (0.52) |  |
| Normal weight (18.5 ≤ BMI < 24.9) kg/m² | 1754 (20.59) | 534 (27.91) | 462 (22.10) | 403 (18.31) | 355 (14.15) |  |
| Overweight (25 ≤ BMI < 29.9) kg/m² | 2825 (35.52) | 721 (42.92) | 742 (39.02) | 729 (33.97) | 633 (26.27) |  |
| Obesity (≥ 30) kg/m² | 3429 (42.88) | 476 (28.09) | 674 (38.04) | 920 (46.10) | 1359 (59.05) |  |
| Educational level (%) |  |  |  |  |  | <0.001 |
| Less than high school | 722 (4.69) | 137 (3.81) | 175 (4.50) | 196 (4.85) | 214 (5.57) |  |
| High school or equivalent | 2972 (33.62) | 602 (29.77) | 648 (32.93) | 764 (32.44) | 958 (39.26) |  |
| College or above | 4388 (61.69) | 1011 (66.42) | 1074 (62.57) | 1116 (62.70) | 1187 (55.16) |  |
| Smoke (%) |  |  |  |  |  |  |
| Never | 4363 (53.79) | 998 (56.87) | 1002 (53.50) | 1120 (52.00) | 1243 (52.85) | 0.019 |
| Former | 2131 (27.35) | 446 (27.04) | 517 (27.30) | 569 (29.51) | 599 (25.55) |  |
| Current | 1588 (18.86) | 306 (16.09) | 378 (19.20) | 387 (18.49) | 517 (21.60) |  |
| Poverty | 2.95 (0.05) | 3.11 (0.05) | 3.09 (0.06) | 2.95 (0.07) | 2.65 (0.07) | <0.001 |
| Waist circumference, cm | 102.44 (0.28) | 96.88 (0.47) | 100.60 (0.37) | 103.74 (0.49) | 108.47 (0.67) | <0.001 |
| Platelets(×10^9/L) | 235.97 (1.07) | 227.41 (1.68) | 230.71 (1.71) | 234.46 (1.82) | 251.14 (2.16) | <0.001 |
| BUN(mg/dl) | 13.91 (0.09) | 13.58 (0.14) | 13.85 (0.16) | 14.20 (0.17) | 14.01 (0.17) | 0.023 |
| FBG, mg/dl | 109.30 (0.54) | 104.39 (0.69) | 107.23 (0.65) | 111.24 (0.87) | 114.26 (1.15) | <0.001 |
| TC, mg/dl | 193.86 (0.81) | 198.89 (1.35) | 194.52 (1.04) | 193.03 (1.27) | 189.10 (1.45) | <0.001 |
| TG, mg/dl | 129.21 (1.76) | 138.54 (3.60) | 129.71 (3.08) | 127.76 (3.27) | 121.01 (2.36) | <0.001 |
| HBA1C,% | 5.71 (0.02) | 5.45 (0.02) | 5.61 (0.02) | 5.79 (0.03) | 6.00 (0.03) | <0.001 |
| UA, mg/dl | 5.59 (0.02) | 5.78 (0.05) | 5.58 (0.04) | 5.56 (0.05) | 5.45 (0.04) | <0.001 |
| eGFR (ml/min/1.73m²) | 99.86 (0.42) | 107.33 (0.89) | 101.50 (0.73) | 96.60 (0.74) | 94.13 (0.89) | <0.001 |
| ACR (mg/g) | 33.79 (2.72) | 13.22 (1.08) | 19.63 (2.47) | 25.07 (2.91) | 76.85 (9.41) | <0.001 |
| Hypertension (%) |  |  |  |  |  | 0.095 |
| No | 1924 (24.61) | 451 (26.76) | 470 (25.07) | 464 (22.87) | 539 (23.74) |  |
| Yes | 6158 (75.39) | 1299 (73.24) | 1427 (74.93) | 1612 (77.13) | 1820 (76.26) |  |
| DM (%) |  |  |  |  |  | <0.001 |
| No | 6096 (81.13) | 1467 (88.62) | 1515 (84.25) | 1508 (78.07) | 1606 (73.66) |  |
| Yes | 1986 (18.87) | 283 (11.38) | 382 (15.75) | 568 (21.93) | 753 (26.34) |  |
| Depression (%) |  |  |  |  |  | <0.001 |
| No | 7357 (92.22) | 1628 (94.14) | 1755 (93.60) | 1902 (92.51) | 2072 (88.66) |  |
| Yes | 725 (7.78) | 122 (5.86) | 142 (6.40) | 174 (7.49) | 287 (11.34) |  |
| Sleep problems (%) |  |  |  |  |  | <0.001 |
| No | 6801 (84.96) | 1520 (87.19) | 1642 (86.95) | 1748 (84.67) | 1891 (81.05) |  |
| Yes | 1281 (15.04) | 230 (12.81) | 255 (13.05) | 328 (15.33) | 468 (18.95) |  |
| Hyperlipemia (%) |  |  |  |  |  | 0.095 |
| No | 1924 (24.61) | 451 (26.76) | 470 (25.07) | 464 (22.87) | 539 (23.74) |  |
| Yes | 6158 (75.39) | 1299 (73.24) | 1427 (74.93) | 1612 (77.13) | 1820 (76.26) |  |
| Stroke (%) |  |  |  |  |  | <0.001 |
| No | 7759 (96.81) | 1713 (98.08) | 1841 (97.60) | 1993 (97.14) | 2212 (94.46) |  |
| Yes | 323 (3.19) | 37 (1.92) | 56 (2.40) | 83 (2.86) | 147 (5.54) |  |
| CKD (%) |  |  |  |  |  | <0.001 |
| No | 6531 (84.48) | 1550 (90.69) | 1606 (87.63) | 1659 (82.70) | 1716 (76.99) |  |
| Yes | 1551 (15.52) | 200 (9.31) | 291 (12.37) | 417 (17.30) | 643 (23.01) |  |
| CKM (%) |  |  |  |  |  | <0.001 |
| Stage1 | 1615 (23.80) | 425 (27.89) | 462 (27.93) | 387 (21.44) | 341 (17.98) |  |
| Stage2 | 5017 (60.63) | 1093 (60.11) | 1121 (56.64) | 1310 (62.80) | 1493 (63.00) |  |
| Stage3 | 503 (5.92) | 126 (6.94) | 136 (7.41) | 117 (4.96) | 124 (4.40) |  |
| Stage4 | 947 (9.64) | 106 (5.06) | 178 (8.01) | 262 (10.81) | 401 (14.62) |  |

BMI, body mass index; BUN, blood urea nitrogen; FBG, fasting blood glucose; TC, cholesterol; TG, triglyceride; HBA1C, glycosylated hemoglobin; UA, uric acid; e-GFR, estimated glomerular filtration rate; ACR, albumin-to-creatinine ratio; DM, diabetes mellitus; CKD, chronic kidney disease; CKM, Cardiovascular-kidney-metabolic.

**Supplementary -table 4. Association between RAR and** **Remove missing values all-cause mortality after delete missing data**

| Variables | Model 1 |  |  | Model 2 |  |  | Model 3 |  |  | Model 4 |  |
| --- | --- | --- | --- | --- | --- | --- | --- | --- | --- | --- | --- |
| HR（95% CI） | P |  | HR（95% CI） | P |  | HR（95% CI） | P |  | HR（95% CI） | P |
| Q1 | Ref |  |  | Ref |  |  | Ref |  |  | Ref |  |
| Q2 | 2.11 (1.45 - 3.05) | <0.001 |  | 1.36 (0.91 - 2.01) | 0.131 |  | 1.38 (0.94 - 2.04) | 0.102 |  | 1.39 (0.95 - 2.03) | 0.089 |
| Q3 | 2.92 (2.11 - 4.03) | <0.001 |  | 1.49 (1.06 - 2.10) | 0.023 |  | 1.45 (1.04 - 2.02) | 0.030 |  | 1.44 (1.04 - 1.99) | 0.029 |
| Q4 | 5.66 (4.15 - 7.71) | <0.001 |  | 3.06 (2.10 - 4.47) | <0.001 |  | 2.95 (2.02 - 4.31) | <0.001 |  | 2.95 (2.07 - 4.22) | <0.001 |
| Per-SD increment of RAR | 1.60 (1.49 - 1.72) | <0.001 |  | 1.58 (1.43 - 1.75) | <0.001 |  | 1.53 (1.38 - 1.70) | <0.001 |  | 1.52 (1.36 - 1.69) | <0.001 |
| P for trends |  | <0.001 |  |  | <0.001 |  |  | <0.001 |  |  | <0.001 |

**Model 1:** crude mode; **Model 2:** adjusted for baseline age, gende, race, Smoke, Educational level; **Model 3** **:** adjusted for covariates in model 1 plus BMI, waist circumference, TG, TC, Platelets, HBA1C, FBG, BUN, UA, Poverty, eGFR, ACR; **Model 4:** adjusted for covariates in model 2 plus Hypertension, DM, Depression, Sleep problems, Hyperlipemia, Stroke, CKD.

**Supplementary -table 5. Association between RAR and** **Remove missing values cardiovascular mortality after delete missing data**

| Variables | Model 1 |  |  | Model 2 |  |  | Model 3 |  |  | Model 4 |  |
| --- | --- | --- | --- | --- | --- | --- | --- | --- | --- | --- | --- |
| HR（95% CI） | P |  | HR（95% CI） | P |  | HR（95% CI） | P |  | HR（95% CI） | P |
| Q1 | Ref |  |  | Ref |  |  | Ref |  |  | Ref |  |
| Q2 | 2.11 (1.45 - 3.05) | <0.001 |  | 1.03 (0.54 - 1.96) | 0.930 |  | 1.00 (0.51 - 1.96) | 0.996 |  | 1.01 (0.52 - 1.98) | 0.969 |
| Q3 | 2.92 (2.11 - 4.03) | <0.001 |  | 1.46 (0.80 - 2.65) | 0.213 |  | 1.31 (0.69 - 2.48) | 0.401 |  | 1.32 (0.71 - 2.47) | 0.386 |
| Q4 | 5.66 (4.15 - 7.71) | <0.001 |  | 2.74 (1.37 - 5.50) | 0.005 |  | 2.13 (1.10 - 4.10) | 0.024 |  | 2.16 (1.17 - 4.00) | 0.014 |
| Per-SD increment of RAR | 1.60 (1.49 - 1.72) | <0.001 |  | 1.58 (1.34 - 1.87) | <0.001 |  | 1.51 (1.30 - 1.74) | <0.001 |  | 1.50 (1.29 - 1.74) | <0.001 |
| P for trends |  | <0.001 |  |  | <0.001 |  |  | <0.001 |  |  | <0.001 |

**Model 1:** crude mode; **Model 2:** adjusted for baseline age, gende, race, Smoke, Educational level; **Model 3** **:** adjusted for covariates in model 1 plus BMI, waist circumference, TG, TC, Platelets, HBA1C, FBG, BUN, UA, Poverty, eGFR, ACR; **Model 4:** adjusted for covariates in model 2 plus Hypertension, DM, Depression, Sleep problems, Hyperlipemia, Stroke, CKD.

**References**

[1] Hou W, Chen S, Zhu C, et al. Associations between smoke exposure and osteoporosis or osteopenia in a US NHANES population of elderly individuals. Front Endocrinol (Lausanne) 2023;14:1074574.

[2] Smagula S F, Zhang G, Gujral S, et al. Association of 24-hour activity pattern phenotypes with depression symptoms and cognitive performance in aging. JAMA Psychiatry 2022;79(10):1023–31.

[3] Yin J, Gong R, Zhang M, et al. Associations between sleep disturbance, inflammatory markers and depressive symptoms: Mediation analyses in a large NHANES community sample. Prog Neuropsychopharmacol Biol Psychiatry 2023;126:110786.

[4] Wang G, Fang L, Chen Y, et al. Association between exposure to mixture of heavy metals and hyperlipidemia risk among U.S. adults: A cross-sectional study. Chemosphere 2023;344:140334.

[5] Yang L, Chen X, Cheng H, et al. Dietary copper intake and risk of stroke in adults: A case-control study based on national health and nutrition examination survey 2013-2018. Nutrients 2022;14(3).
